# Supplementary material for: Efficacy of chitosan/double-stranded RNA polyplex nanoparticles for gene silencing under variable environmental conditions
Source: Royal Society of Chemistry journal article supplement (doi:10.1039/d0en00137f), 2020-01-01
Supplement: d0en00137f1.pdf [file d0en00137f1.pdf]

### Primers

|     | Forward                                  | Reverse                                   | Product Size (bp) |
|-----|------------------------------------------|-------------------------------------------|-------------------|
| GFP | (TAATACGACTCACTATAG)AGGGTGAAGGTGATGCAACA | (TAATACGACTCACTATAG)GCCGTTTCATATGATCTGGGT | 219               |

**Table S1** – Oligo sequence for in-vitro synthesis of dsRNA. T7 primer sequence is labeled in parenthesis.

### Confirmation of GFP Knockdown

|       | Expression | Std. Error    | 95% CI        | P     |
|-------|------------|---------------|---------------|-------|
| dsRNA | 0.421      | 0.124 - 0.907 | 0.108 - 2.944 | 0.028 |
| PNs   | 0.48       | 0.157 - 1.529 | 0.100 - 2.801 | 0.041 |

**Table S2** - CGC4 *C. elegans* were exposed to GFP dsRNA and PNs (100 ng/ $\mu$ L) as described in Methods and GFP expression was quantitated. This data was previously published in the supplemental information of Lichtenberg, et.al.<sup>1</sup>, and details of this experiment can be found therein.

### FCS Data Plot Examples

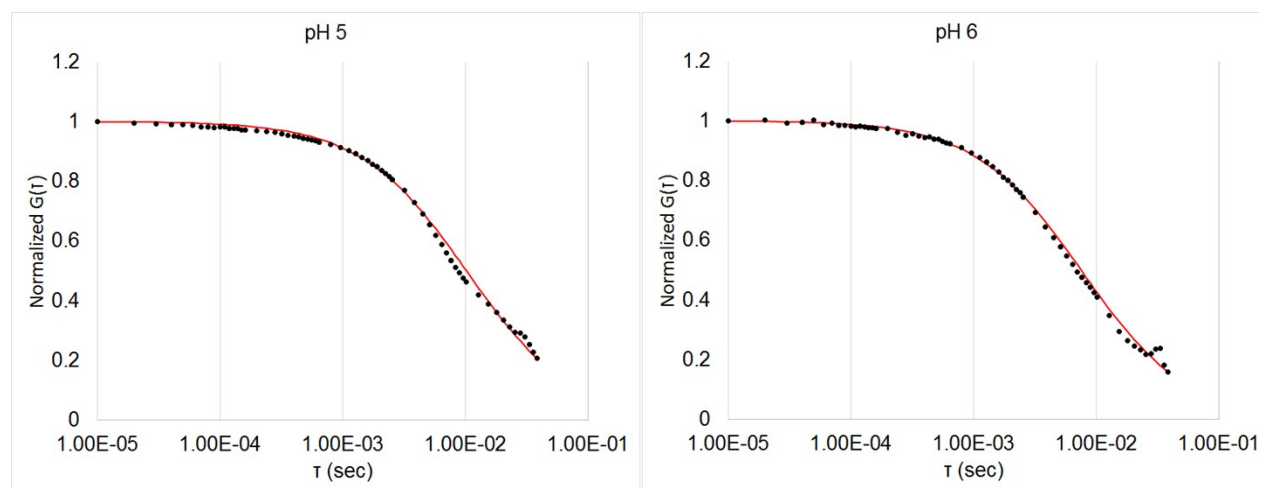

**Figure S1** – Sample plots of FCS data generated in this study. Collected data is shown as black points, and the fit of the data to the autocorrelation function is shown as a red line. In both cases, the data was normalized to the maximum G(T) in each dataset.

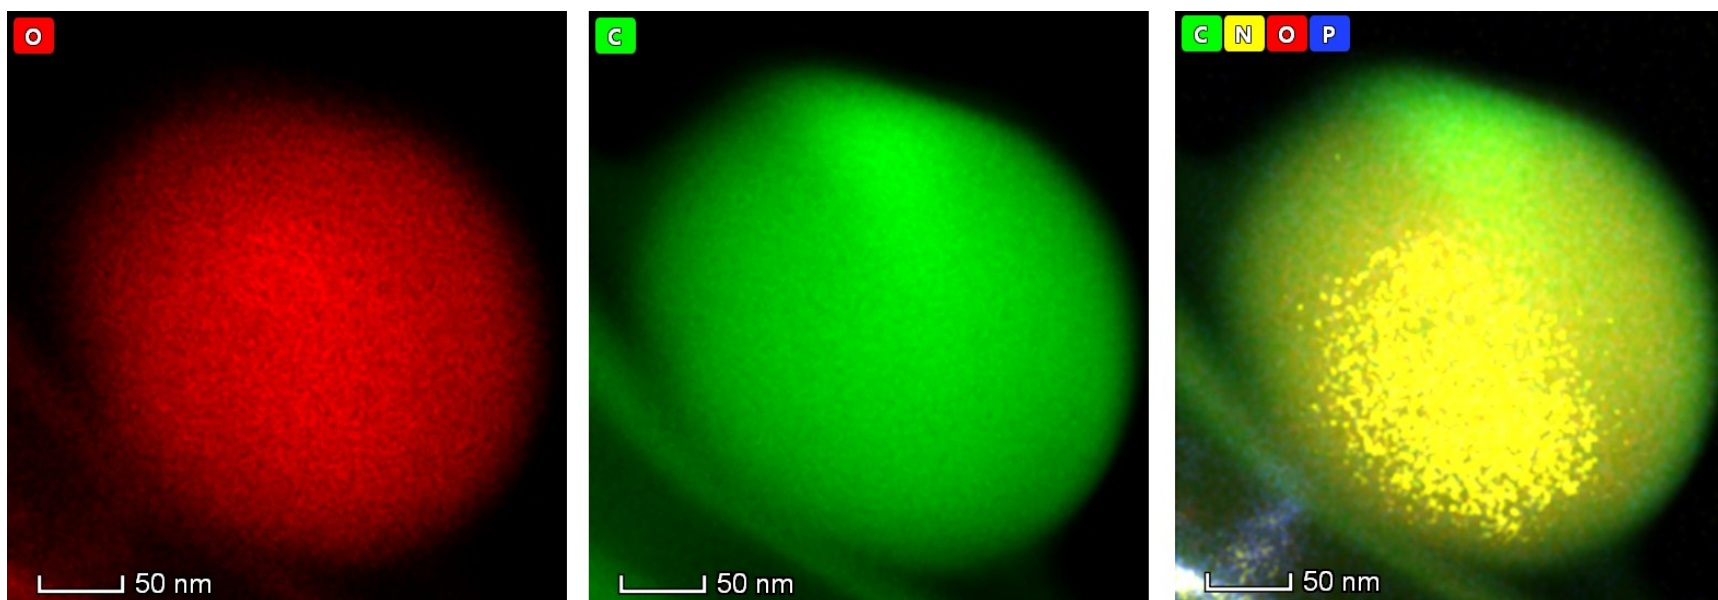

**Figure S2** – EDS elemental maps for oxygen (left), carbon (center), and all measured elements (right).

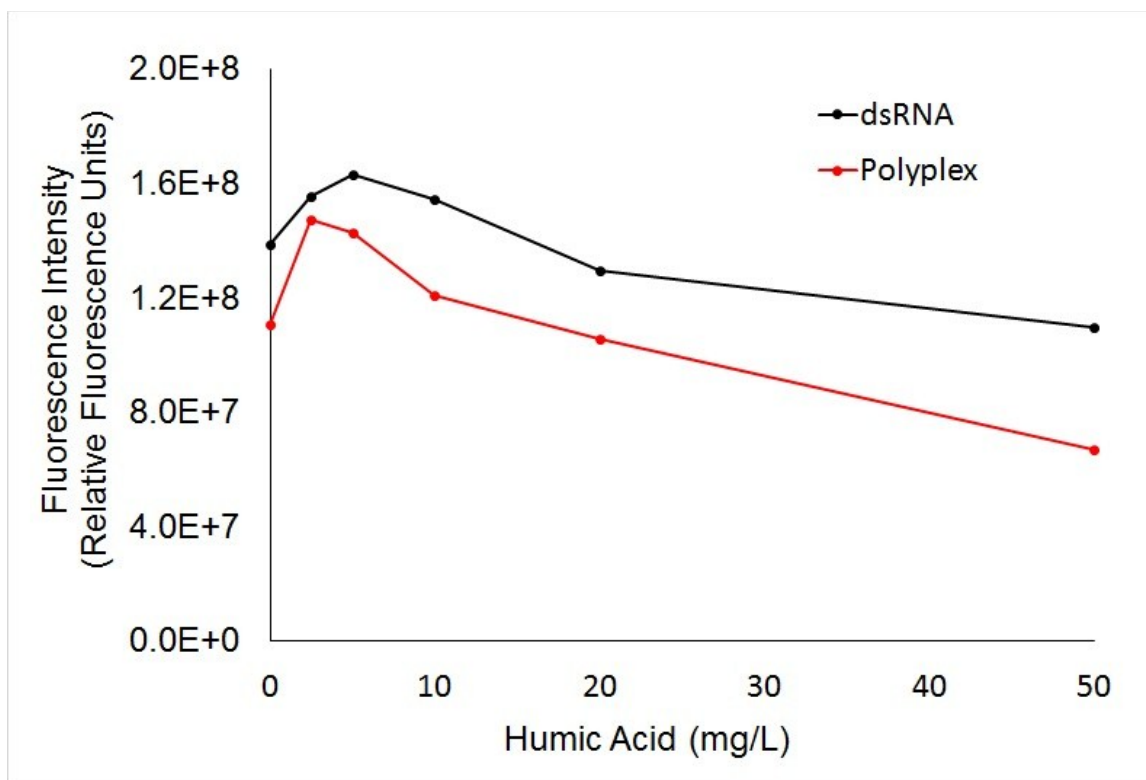

**Figure S3** – Quenching of AlexaFluor 488 fluorescence by humic acid. AlexaFluor 488 labeled dsRNA and chitosan/dsRNA polyplexes were added to moderately hard reconstituted water (MHRW) amended with the indicated concentration of Pahokee peat humic acid, and fluorescence intensity was measured (Ex = 490 nm; Em = 525 nm). Background fluorescence from MHRW/humic acid blanks were subtracted from the corresponding measurement.

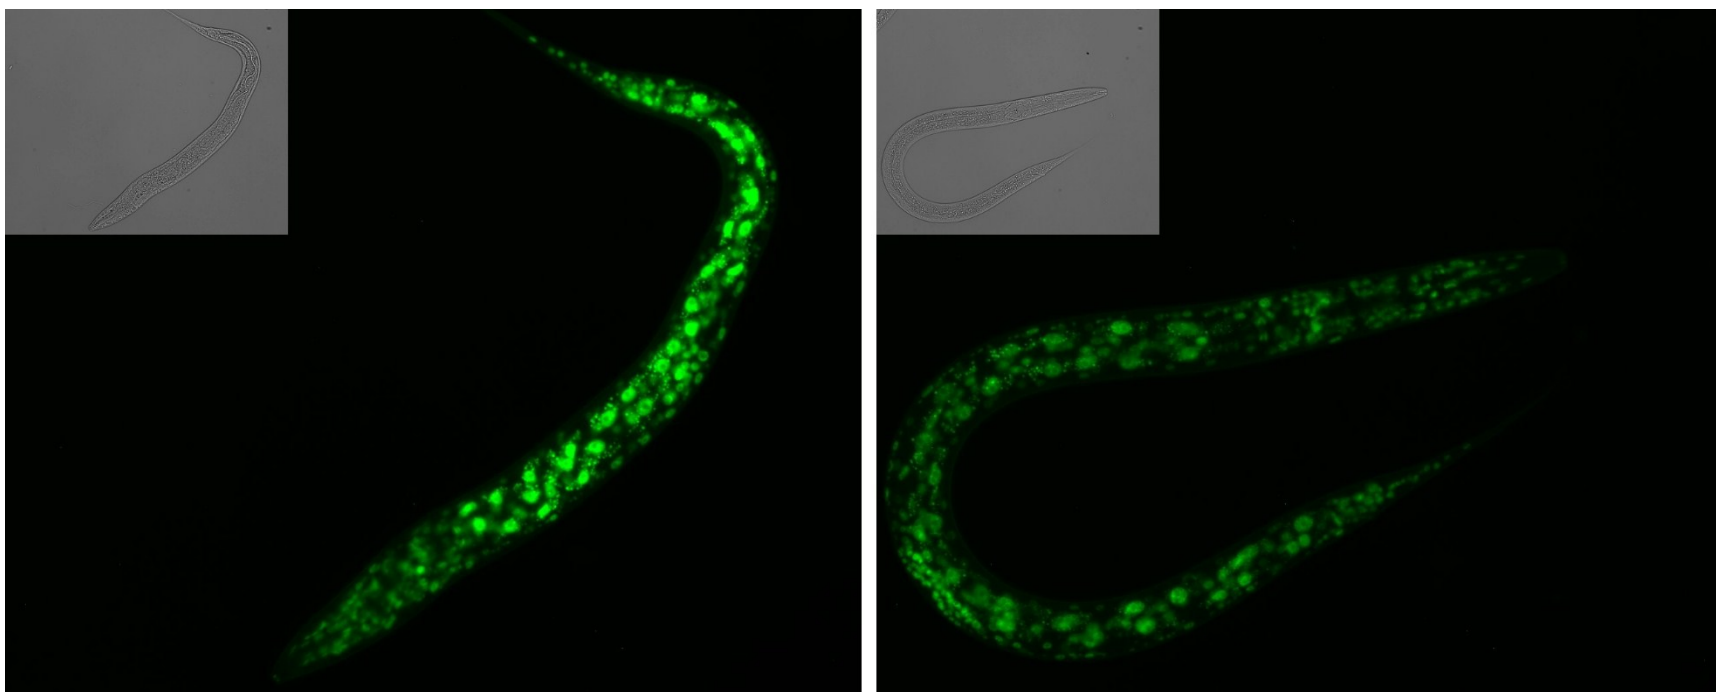

**Figure S4** – Example images of control (left) and dsRNA (100 ng/ $\mu$ L) exposed CGC4 *Caenorhabditis elegans*. Exposure duration was 24 hrs, and imaging was performed as detailed in Methods.

1. S. S. Lichtenberg, O. V. Tsyusko, S. R. Palli and J. M. Unrine, *Environ. Sci. Technol.*, 2019, DOI: 10.1021/acs.est.8b06560.
